# Supplementary material for: Buried treasure in a public repository: Mining mitochondrial genes of 32 annelid species from sequence reads deposited in the Sequence Read Archive (SRA)
Source: PeerJ journal article supplement (doi:10.7717/peerj.16446), 2023-11-29
Supplement: Supplementary_data_1.pdf [file Supplementary_data_1.pdf]

Supplementary data 1. Best-fit substitution model for each gene selected with ModelFinder.

atp6: mtInv+F+R6  
atp8: mtZOA+F+R5  
cox3: mtZOA+R6  
cox2: mtZOA+F+R6  
cox1: mtZOA+R5  
cytb: mtZOA+R6  
nad1: mtART+R6  
nad2: mtInv+F+R7  
nad3: mtMet+I+G4  
nad4l: mtMet+I+G4  
nad4: mtInv+F+R7  
nad5: mtInv+F+R7  
nad6: mtInv+F+I+G4
